# Supplementary material for: Clonally expanded B cells in multiple sclerosis bind EBV EBNA1 and GlialCAM
Source: Springer Nature journal article supplement (doi:10.1038/s41586-022-04432-7), 2022-01-24
Supplement: 41586_2022_4432_MOESM1_ESM.pdf [file 41586_2022_4432_MOESM1_ESM.pdf]

## Supplementary information

---

# Clonally expanded B cells in multiple sclerosis bind EBV EBNA1 and GlialCAM

---

In the format provided by the authors and unedited

# Clonally Expanded B Cells in Multiple Sclerosis Bind EBV EBNA1 and GlialCAM

**Authors:** Tobias V. Lanz<sup>1,2,3,4</sup>, R. Camille Brewer<sup>1,4</sup>, Peggy P. Ho<sup>5</sup>, Jae-Seung Moon<sup>1,4</sup>, Kevin M. Jude<sup>6</sup>, Daniel Fernandez<sup>7</sup>, Ricardo A. Fernandes<sup>6</sup>, Alejandro M. Gomez<sup>1,4</sup>, Gabriel-Stefan Nadj<sup>1,4</sup>, Christopher M. Bartley<sup>8</sup>, Ryan D. Schubert<sup>9</sup>, Isobel A. Hawes<sup>9</sup>, Sara E. Vazquez<sup>10</sup>, Manasi Iyer<sup>11</sup>, J. Bradley Zuchero<sup>11</sup>, Bianca Teegen<sup>12</sup>, Jeffrey E. Dunn<sup>13</sup>, Christopher B. Lock<sup>13</sup>, Lucas B. Kipp<sup>13</sup>, Victoria C. Cotham<sup>14,15</sup>, Beatrix M. Ueberheide<sup>14,15</sup>, Blake T. Aftab<sup>16</sup>, Mark S. Anderson<sup>17</sup>, Joseph L. DeRisi<sup>10,18</sup>, Michael R. Wilson<sup>9</sup>, Rachael J. M. Bashford-Rogers<sup>19</sup>, Michael Platten<sup>2,3,20</sup>, K. Christopher Garcia<sup>6</sup>, Lawrence Steinman<sup>5</sup> & William H. Robinson<sup>1,4,\*</sup>

## Affiliations:

<sup>1</sup>Division of Immunology and Rheumatology, Department of Medicine, Stanford University School of Medicine, Stanford, CA, USA.

<sup>2</sup>Department of Neurology, Mannheim Center for Translational Neurosciences (MCTN), Medical Faculty Mannheim, University of Heidelberg, Mannheim, Germany.

<sup>3</sup>Department of Neurology and National Center for Tumor Diseases, University Hospital Heidelberg, Heidelberg, Germany.

<sup>4</sup>The Geriatric Research, Education, and Clinical Center (GRECC), VA Palo Alto Health Care System, Palo Alto, CA, USA.

<sup>5</sup>Department of Neurology and Neurological Sciences, Stanford University School of Medicine, Beckman Center for Molecular Medicine, Stanford, CA, USA.

<sup>6</sup>Department of Molecular and Cellular Physiology, Stanford University School of Medicine, Beckman Center for Molecular Medicine, Stanford, CA, USA.

<sup>7</sup>Macromolecular Structure Knowledge Center, Stanford ChEM-H Institute, Stanford, CA, USA.

<sup>8</sup>Weill Institute for Neurosciences, Department of Psychiatry and Behavioral Sciences, University of California San Francisco, San Francisco, CA, USA.

<sup>9</sup>Weill Institute for Neurosciences, Department of Neurology, University of California San Francisco, San Francisco, CA, USA.

<sup>10</sup>Department of Biochemistry and Biophysics, University of California San Francisco, San Francisco, CA, USA.

<sup>11</sup>Department of Neurosurgery, Stanford University School of Medicine, Stanford, CA, USA.

<sup>12</sup>Institute of Experimental Immunology, Euroimmun AG, Lubeck, Germany.

<sup>13</sup>Division of Neuroimmunology, Department of Neurology and Neurological Sciences, Stanford University School of Medicine, Stanford, CA, USA.

<sup>14</sup>Department of Biochemistry and Molecular Pharmacology, NYU Perlmutter Cancer Center, NYU School of Medicine, New York, NY, USA.

<sup>15</sup>NYU Langone Health Proteomics Laboratory, Division of Advanced Research Technologies, NYU School of Medicine, New York, NY, USA.

<sup>16</sup>Preclinical Science and Translational Medicine, Atara Biotherapeutics, South San Francisco, CA, USA.

<sup>17</sup>Department of Medicine, Diabetes Center, University of California San Francisco, San Francisco, CA, USA.

<sup>18</sup>Chan Zuckerberg Biohub, University of California San Francisco, San Francisco, CA, USA.

<sup>19</sup>Wellcome Centre for Human Genetics, University of Oxford, Oxford, UK.

<sup>20</sup>DKTK Clinical Cooperation Unit Neuroimmunology and Brain Tumor Immunology, German Cancer Research Center (DKFZ), Heidelberg, Germany.

\*e-mail: wrobins@stanford.edu

## **Supplementary Information**

| <b>Table of Content</b>  | <b>Page</b> |
|--------------------------|-------------|
| Supplementary Table 1    | 4           |
| Supplementary Table 2    | 5           |
| Supplementary Table 3    | 6           |
| Supplementary Table 4    | 7           |
| Supplementary Table 5    | 8           |
| Supplementary Table 6    | 10          |
| Supplementary Figure 1   | 11          |
| Supplementary Figure 2   | 12          |
| Supplementary Discussion | 13          |
| References               | 14          |

**Supplementary Table 1**

|             | HLA-A 1 | HLA-A 2 | HLA-B 1 | HLA-B 2 | HLA-C 1 | HLA-C 2 |
|-------------|---------|---------|---------|---------|---------|---------|
| <b>MS9</b>  | 02:05   | 68:01   | 15:03   | 50:01   | 02:10   | 06:02   |
| <b>MS12</b> | 31:01   | 32:01   | 40:01   | 40:01   | 03:04   | 03:04   |
| <b>MS20</b> | 02:01   | 02:01   | 18:01   | 51:01   | 07:01   | 14:02   |
| <b>MS21</b> | 01:01   | 03:01   | 07:02   | 58:01   | 03:02   | 07:02   |
| <b>MS28</b> | 01:01   | 03:01   | 07:02   | 07:02   | 07:02   | 07:02   |
| <b>MS30</b> | 01:01   | 24:02   | 07:02   | 08:01   | 07:01   | 07:02   |
| <b>MS31</b> | 01:01   | 02:01   | 08:01   | 13:02   | 06:02   | 07:02   |
| <b>MS37</b> | 03:01   | 68:02   | 15:10   | 35:01   | 03:04   | 04:01   |
| <b>MS39</b> | 01:01   | 03:01   | 08:01   | 51:01   | 07:01   | 15:02   |

|             | HLA-DRB1_1 | HLA-DRB1_2 | HLA-DRB345_1 | HLA-DRB345_2 | HLA-DQA1_1 | HLA-DQA1_2 | HLA-DQB1_1 | HLA-DQB1_2 | HLA-DPA1_1 | HLA-DPA1_2 | HLA-DPB1_1 | HLA-DPB1_2 |
|-------------|------------|------------|--------------|--------------|------------|------------|------------|------------|------------|------------|------------|------------|
| <b>MS9</b>  | 07:01      | 15:01      | 4*01:01      | 5*01:01      | 01:02      | 02:01      | 02:02      | 06:02      | 01:03      | 01:03      | 03:01      | 04:01      |
| <b>MS12</b> | 01:01      | 04:04      | 4*01:03      | null         | 01:01      | 03:01      | 03:02      | 05:01      | 01:03      | 02:01      | 01:01      | 02:01      |
| <b>MS20</b> | 08:01      | 11:01      | 3*02:02      | null         | 04:02      | 05:05      | 04:02      | 03:01      | 01:03      | 01:03      | 04:01      | 04:02      |
| <b>MS21</b> | 15:01      | 13:02      | 3*01:01      | 5*01:01      | 01:02      | 01:02      | 06:02      | 06:09      | 01:03      | 01:03      | 04:01      | 104:01     |
| <b>MS28</b> | 07:01      | 15:01      | 4*01:01      | 5*01:01      | 01:02      | 02:01      | 02:02      | 06:02      | 02:01      | 02:01      | 01:01      | 11:01      |
| <b>MS30</b> | 03:01      | 15:01      | 3*01:01      | 5*01:01      | 01:02      | 05:01      | 02:01      | 06:02      | 01:03      | 02:01      | 01:01      | 15:01      |
| <b>MS31</b> | 03:01      | 15:01      | 3*01:01      | 5*01:01      | 01:02      | 05:01      | 02:01      | 06:02      | 01:03      | 01:03      | 03:01      | 03:01      |
| <b>MS37</b> | 01:01      | 08:04      | null         | null         | 01:01      | 05:01      | 03:01      | 05:01      | 01:03      | 01:03      | 02:01      | 04:02      |
| <b>MS39</b> | 03:01      | 07:01      | 3*01:01      | 4*01:03      | 02:01      | 05:01      | 02:01      | 03:03      | 01:03      | 01:03      | 03:01      | 06:01      |

**Supplementary Table 1.** Genotype of full HLA locus. HLA-DRB1\*15:01 (dark red) is the main risk allele for MS, HLA-DRB1\*03:01 (bright red) is a secondary risk allele for MS.





## Supplementary Table 4

| Protein Antigen                  | Name in Floures               | Name in Suopj. Figure            | Product Name                                       | Company         | catalogue #    | Lot #       | residues  | source  | Usulj |
|----------------------------------|-------------------------------|----------------------------------|----------------------------------------------------|-----------------|----------------|-------------|-----------|---------|-------|
| GlialCAM ECD                     | GlialCAM ECD                  | GlialCAM ECD A                   | HEPACAM Protein, Human, Recombinant (Ecd, His Tag) | SINO Biological | R6047-H08H     | ECH011-2806 | AA34-240  | HEK293  | 0.10  |
| GlialCAM ECD                     | GlialCAM ECD                  | GlialCAM ECD B                   | Recombinant Human HEPACAM protein                  | Abcam           | ab151670       | GR3329367-1 | AA34-240  | HEK293  | 0.10  |
| GlialCAM ECD                     | GlialCAM ECD                  | GlialCAM ECD C                   | Recombinant Human HEPACAM                          | Sino Biological | R6047-H08H     | LC10F0E2808 | AA1-240   | HEK293  | 0.10  |
| GlialCAM ECD                     | GlialCAM ECD                  | GlialCAM ECD D                   | Recombinant Human HEPACAM protein                  | Abcam           | ab151670       | GR3241129-1 | AA34-240  | HEK293  | 0.10  |
| GlialCAM ICD                     | GlialCAM ICD                  | GlialCAM ICD A                   | Hepracam intracellular region, self expression     | self            |                | batch 1     | AA262-416 | E. Coli | 0.10  |
| GlialCAM ICD                     | GlialCAM ICD                  | GlialCAM ICD C                   | Hepracam intracellular region, self expression     | self            |                | batch 2     | AA262-416 | E. Coli | 0.10  |
| Hepracam full-length             | Hepracam full-length          | GlialCAM Full Length             | HEPACAM (NM_152722) Human Recombinant Protein      | OrfGene         | TP323693       | WX02C25F    | AA1-416   | HEK293T | 0.10  |
| Peptide Antigen                  | Name in Suopj. Figure         | Name in Suopj. Figure            | AA Sequence                                        | Company         | Peptide Length | Usulj       |           |         |       |
| GlialCAM p315-334                |                               | GlialCAM p315-334                | IKNSPTEENRPAEPSPGSAE                               | Sigma Aldrich   | 20             | 0.10        |           |         |       |
| GlialCAM p320-339                |                               | GlialCAM p320-339                | TEENRPAEPSPGSAE                                    | Sigma Aldrich   | 20             | 0.10        |           |         |       |
| GlialCAM p321-340                |                               | GlialCAM p321-340                | TEENRPAEPSPGSAE                                    | Sigma Aldrich   | 20             | 0.10        |           |         |       |
| GlialCAM p327-346                |                               | GlialCAM p327-346 A              | PEPRSAEPSPGPGYVSPAV                                | Sigma Aldrich   | 20             | 0.10        |           |         |       |
| GlialCAM p327-346                |                               | GlialCAM p327-346 B              | PEPRSAEPSPGPGYVSPAV                                | Sigma Aldrich   | 20             | 0.10        |           |         |       |
| GlialCAM p333-352                |                               | GlialCAM p333-352                | TEPGPGYVSPAVPGRSPG                                 | Sigma Aldrich   | 20             | 0.10        |           |         |       |
| GlialCAM p334-353                |                               | GlialCAM p334-353 A              | EPGPGYVSPAVPGRSPGL                                 | Sigma Aldrich   | 20             | 0.10        |           |         |       |
| GlialCAM p334-353                |                               | GlialCAM p334-353 B              | EPGPGYVSPAVPGRSPGL                                 | Sigma Aldrich   | 20             | 0.10        |           |         |       |
| GlialCAM p340-359                |                               | GlialCAM p340-359                | VYSPVAVPGRSPGLPGRAR                                | Sigma Aldrich   | 20             | 0.10        |           |         |       |
| GlialCAM p341-360                | GlialCAM p341-360             | GlialCAM p341-360                | VYSPVAVPGRSPGLPGRAR                                | Sigma Aldrich   | 20             | 0.10        |           |         |       |
| GlialCAM p346-365                |                               | GlialCAM p346-365                | VPRSPGLTIRARVYRSP                                  | Sigma Aldrich   | 20             | 0.10        |           |         |       |
| GlialCAM p348-367                |                               | GlialCAM p348-367                | GRSPGLTIRARVYRSP                                   | Sigma Aldrich   | 20             | 0.10        |           |         |       |
| GlialCAM p352-371                |                               | GlialCAM p352-371                | GLPISARVYRSP                                       | Sigma Aldrich   | 20             | 0.10        |           |         |       |
| GlialCAM p355-374                |                               | GlialCAM p355-374                | IRSAARVYRSPSPATGRT                                 | Sigma Aldrich   | 20             | 0.10        |           |         |       |
| GlialCAM p358-377                |                               | GlialCAM p358-377                | ARVYRSPSPATGRT                                     | Sigma Aldrich   | 20             | 0.10        |           |         |       |
| GlialCAM p362-381                |                               | GlialCAM p362-381                | SPSPSPATGRT                                        | Sigma Aldrich   | 20             | 0.10        |           |         |       |
| GlialCAM p364-383                |                               | GlialCAM p364-383                | SPSPSPATGRT                                        | Sigma Aldrich   | 20             | 0.10        |           |         |       |
| GlialCAM p369-388                | GlialCAM p369-388             | GlialCAM p369-388 A              | PATGRTSPSPSPSPGSR                                  | Sigma Aldrich   | 20             | 0.10        |           |         |       |
| GlialCAM p369-388                | GlialCAM p369-388             | GlialCAM p369-388 B              | ATGRTSPSPSPSPGSR                                   | Sigma Aldrich   | 20             | 0.10        |           |         |       |
| GlialCAM p370-389                |                               | GlialCAM p370-389 A              | ATGRTSPSPSPSPGSR                                   | GenScript       | 20             | 0.10        |           |         |       |
| GlialCAM p370-389                |                               | GlialCAM p370-389 B              | ATGRTSPSPSPSPGSR                                   | Sigma Aldrich   | 20             | 0.10        |           |         |       |
| GlialCAM p370-389                |                               | GlialCAM p370-389 C              | ATGRTSPSPSPSPGSR                                   | Sigma Aldrich   | 20             | 0.10        |           |         |       |
| GlialCAM p376-395                |                               | GlialCAM p376-395 A              | SSPPRSPSPSPSPGSR                                   | Sigma Aldrich   | 20             | 0.10        |           |         |       |
| GlialCAM p376-395                |                               | GlialCAM p376-395 B              | SSPPRSPSPSPSPGSR                                   | Sigma Aldrich   | 20             | 0.10        |           |         |       |
| GlialCAM p378-389                |                               | GlialCAM p378-389                | PPRSPSPGSR                                         | GenScript       | 12             | 0.10        |           |         |       |
| GlialCAM p382-401                | GlialCAM p382-401             | GlialCAM p382-401                | PSPPRSPSPSPSPGSR                                   | Sigma Aldrich   | 20             | 0.10        |           |         |       |
| GlialCAM p383-402                |                               | GlialCAM p383-402                | SSPPRSPSPSPSPGSR                                   | Sigma Aldrich   | 20             | 0.10        |           |         |       |
| GlialCAM p369-388 Ctr380         |                               | GlialCAM p369-388 Ctr380         | ATGRTSPSPSPSPGSR                                   | Sigma Aldrich   | 20             | 0.10        |           |         |       |
| GlialCAM p369-388 Ctr387         |                               | GlialCAM p369-388 Ctr387         | ATGRTSPSPSPSPGSR                                   | Sigma Aldrich   | 20             | 0.10        |           |         |       |
| GlialCAM p369-388 Ctr373         |                               | GlialCAM p369-388 Ctr373         | ATGRTSPSPSPSPGSR                                   | Sigma Aldrich   | 20             | 0.10        |           |         |       |
| GlialCAM p369-388 Ctr373/380     |                               | GlialCAM p369-388 Ctr373/380     | ATGRTSPSPSPSPGSR                                   | Sigma Aldrich   | 20             | 0.10        |           |         |       |
| GlialCAM p369-388 Ctr373/380/387 |                               | GlialCAM p369-388 Ctr373/380/387 | ATGRTSPSPSPSPGSR                                   | Sigma Aldrich   | 20             | 0.10        |           |         |       |
| GlialCAM p370-389 pSer383/384    |                               | GlialCAM p370-389 pSer383/384    | ATGRTSPSPSPSPGSR                                   | Sigma Aldrich   | 20             | 0.10        |           |         |       |
| GlialCAM p370-389 pSer376        | GlialCAM p370-389 pSer376     | GlialCAM p370-389 pSer376        | ATGRTSPSPSPSPGSR                                   | GenScript       | 20             | 0.10        |           |         |       |
| GlialCAM p370-389 pSer376/377    | GlialCAM p370-389 pSer376/377 | GlialCAM p370-389 pSer376/377 A  | ATGRTSPSPSPSPGSR                                   | Sigma Aldrich   | 20             | 0.10        |           |         |       |
| GlialCAM p370-389 pSer376/377    | GlialCAM p370-389 pSer376/377 | GlialCAM p370-389 pSer376/377 B  | ATGRTSPSPSPSPGSR                                   | GenScript       | 20             | 0.10        |           |         |       |
| GlialCAM p370-389 pSer377        | GlialCAM p370-389 pSer377     | GlialCAM p370-389 pSer377        | ATGRTSPSPSPSPGSR                                   | GenScript       | 20             | 0.10        |           |         |       |
| GlialCAM p370-389 pSer377/383    | GlialCAM p370-389 pSer377/383 | GlialCAM p370-389 pSer377/383    | ATGRTSPSPSPSPGSR                                   | GenScript       | 20             | 0.10        |           |         |       |

Supplementary Table 4. GlialCAM proteins and peptides.



## Supplementary Table 5

### Crystallographic data collection and refinement statistics

| EBNA1 peptide 386-405/MS39p2w174 Fab                                        |                             |
|-----------------------------------------------------------------------------|-----------------------------|
| <b>Data collection</b>                                                      |                             |
| Beamline                                                                    | SSRL BL12-2                 |
| Wavelength (Å)                                                              | 0.97946                     |
| Space group                                                                 | I222                        |
| Cell dimensions                                                             |                             |
| <i>a</i> , <i>b</i> , <i>c</i> (Å)                                          | 119.66, 137.56, 179.00      |
| $\alpha$ , $\beta$ , $\gamma$ (°)                                           | 90.00, 90.00, 90.00         |
| Matthews coefficient (Å <sup>3</sup> /Da) <sup>a</sup>                      | 3.7                         |
| Solvent content (%)                                                         | 66.8                        |
| Anisotropy                                                                  | 0.72                        |
| Resolution (Å) <sup>b</sup>                                                 | 45.14(2.19)                 |
| <i>R</i> <sub>merge</sub> <sup>c</sup>                                      | 0.16(5.92)                  |
| <i>I</i> / $\sigma$ <i>I</i> ratio <sup>d</sup>                             | 5.5(0.7)                    |
| Uncorrected completeness (%) <sup>e,f</sup>                                 | 96.1(78.0)                  |
| Spherical completeness (%) <sup>g</sup>                                     | 54.7(13.1)                  |
| Ellipsoidal completeness (%) <sup>h</sup>                                   | 92.5(72.4)                  |
| Reflections (total/unique)                                                  | 51,233(3,637)               |
| Redundancy <sup>j</sup>                                                     | 3.2(2.0)                    |
| <b>Refinement</b>                                                           |                             |
| Resolution (Å)                                                              | 45.14-2.50                  |
| No. reflections/test set                                                    | 36,574/1,912                |
| <i>R</i> <sub>work</sub> / <i>R</i> <sub>free</sub> <sup>k</sup>            | 21.1/25.2                   |
| Mean B value (Å <sup>2</sup> )                                              | 56.4                        |
| <i>F</i> <sub>obs</sub> - <i>F</i> <sub>calc</sub> correlation <sup>l</sup> | 0.90                        |
| No. atoms                                                                   |                             |
| Protein                                                                     | 6,778                       |
| Ligand/ion                                                                  | 4 glycerol/1 chlorine       |
| Water                                                                       | 24                          |
| <i>B</i> -factors                                                           |                             |
| Protein                                                                     | 46 (overall)                |
| Ligand/ion                                                                  | 73 (glycerol)/45 (chlorine) |
| Water                                                                       | 52                          |
| Ramachandran statistics <sup>m</sup>                                        |                             |
| Most favored/allowed regions (%)                                            | 100                         |
| Disallowed regions (%)                                                      | 0                           |
| R.m.s. deviations                                                           |                             |
| Bond lengths (Å)                                                            | 0.33                        |
| Bond angles (°)                                                             | 0.55                        |

<sup>a</sup>Ratio of the volume of the asymmetric unit to the molecular weight of all protein in the asymmetric unit

<sup>b</sup>Value in parentheses is for the highest-resolution shell: 2.24 – 2.19 Å.

<sup>c</sup>Reliability factor for symmetry-related reflections calculated as:  $R_{\text{merge}} = \frac{\sum_{hkl} \sum_{j=1}^N |I_{hkl} - I_{hkl}(j)|}{\sum_{hkl} \sum_{j=1}^N I_{hkl}(j)}$ , where *N* is the redundancy of the data. In parentheses, the cumulative value at the highest-resolution shell

<sup>d</sup>Ratio of mean intensity to the mean standard deviation of the intensity over the entire resolution range

<sup>e</sup>Fraction of measured reflections to possible observations at the resolution range

<sup>f</sup>Completeness of the uncorrected data set

<sup>g</sup>Completeness within the sphere that contains the ellipsoid, after removing reflections outside of the ellipsoid

<sup>h</sup>The amount of expected reflections within the ellipsoid that are actually measured

<sup>j</sup>Number of measurements of individual, symmetry unique reflections

<sup>k</sup>Average deviation between the observed and calculated structure factors calculated as:  $R_{\text{work}} = \sum_{\text{hkl}} \frac{||F_{\text{obs}}| - |F_{\text{calc}}||}{\sum_{\text{hkl}} |F_{\text{obs}}|}$ , where the  $F_{\text{obs}}$  and  $F_{\text{calc}}$  are the observed and calculated structure factor amplitudes of reflection hkl.  $R_{\text{free}}$  is equal to  $R_{\text{factor}}$  but for a randomly selected 5.0 % subset of the total reflections that were held aside throughout refinement for cross-validation

<sup>l</sup>Correlation coefficient between observed and calculated structure factor amplitudes

<sup>m</sup>According to Molprobit for non-proline and non-glycine residues

**Supplementary Table 5.** Crystallographic data and refinement statistics.

## Supplementary Table 6

| antibody            | ligand                         | KD (M)   | KD Error | kon (M <sup>-1</sup> s <sup>-1</sup> ) | kon Error | koff (s <sup>-1</sup> ) | koff Error | n |
|---------------------|--------------------------------|----------|----------|----------------------------------------|-----------|-------------------------|------------|---|
| MS39p2w174          | EBNA1 protein                  | 1.99E-09 | 6.25E-10 | 4.07E+04                               | 1.61E+04  | 7.32E-05                | 1.06E-05   | 4 |
| MS39p2w174 germline | EBNA1 protein                  | 4.19E-09 | 7.62E-10 | 2.94E+04                               | 1.65E+04  | 1.14E-04                | 4.53E-05   | 4 |
| MS39p2w174          | Glia1CAM protein               | 1.91E-10 | 1.73E-11 | 2.61E+05                               | 5.01E+04  | 5.00E-05                | 1.21E-05   | 3 |
| MS39p2w174 germline | Glia1CAM protein               | 1.05E-08 | 4.12E-09 | 4.28E+04                               | 1.39E+04  | 4.12E-04                | 4.79E-05   | 3 |
| MS39p2w174          | EBNA1 AA386-405                | 2.67E-09 | 7.83E-11 | 2.40E+05                               | 5.28E+03  | 6.40E-04                | 1.24E-05   | 4 |
| MS39p2w174          | Glia1CAM AA370-389             | 3.02E-07 | 3.10E-08 | 7.15E+04                               | 6.39E+03  | 2.16E-02                | 1.09E-03   | 4 |
| MS39p2w174          | Glia1CAM AA370-389 pSer376     | 6.10E-09 | 2.69E-10 | 2.80E+05                               | 1.10E+04  | 1.71E-03                | 3.40E-05   | 4 |
| MS39p2w174          | Glia1CAM AA370-389 pSer376/377 | 3.73E-09 | 1.50E-10 | 3.23E+05                               | 1.14E+04  | 1.20E-03                | 2.33E-05   | 4 |

**Supplementary Table 6.**  $K_D$ ,  $K_{on}$ , and  $K_{off}$  values for antibody-ligand pairs. Values correspond to **Fig. 2 k,l** (MS39p2w174 and Germline with EBNA1 protein), **Fig. 3 e,f** (MS39p2w174 and Germline with Glia1CAM protein), and **Fig. 3 k,l** (MS39p2w174 with EBNA1 AA386-405, Glia1CAM AA370-389, and phosphorylated Glia1CAM AA370-389). Measurements are representative of at least 3 independent experiments. Values are averages of n replicate measurements in serial dilutions.

## Supplementary Figure 1

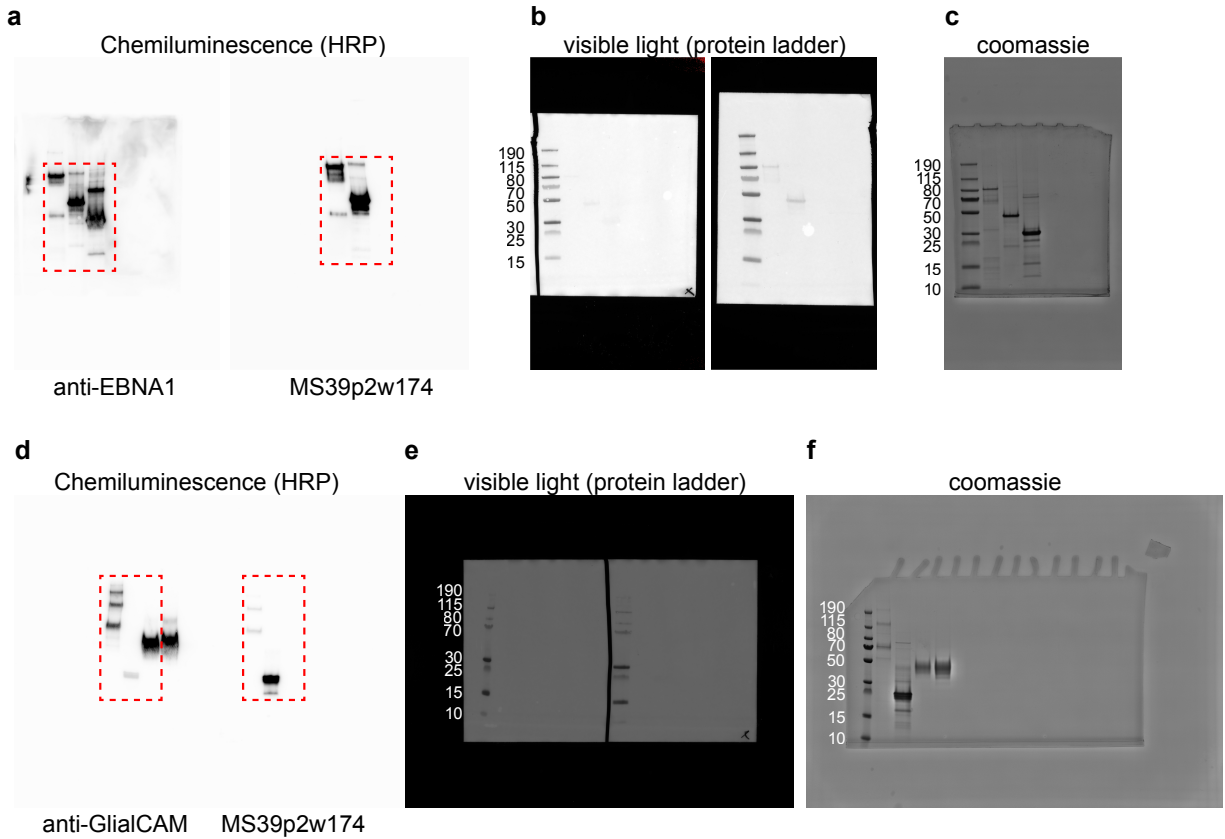

**Supplementary Figure 1.** Raw western blot images. **a-c**, recombinant EBNA1 proteins (full-length, AA328-641, and AA408-641), corresponding to (**Fig. 2c**). **d-f**, recombinant GlialCAM proteins (full-length, ICD, and ECD), corresponding to (**Fig. 3c**). Recombinant proteins were run on three separate blots, stained with commercial anti-EBNA1 or anti-GlialCAM (**a,d**, left), MS39p2w174 (**a,d**, right), and coomassie (**c,f**). Red frames: cropped images used for figures.



## Supplementary Discussion

### Patient collective and MS diagnosis

As mentioned in the main manuscript, all MS patients included in this study cohort were selected for CSF pleocytoses above 10 cells /  $\mu\text{l}$ . This selection was made due to technical considerations, as single-cell B cell sorting and sequencing became increasingly challenging below a threshold of 5 cells /  $\mu\text{l}$  and yielded significantly more BCR sequences above 10 cells /  $\mu\text{l}$ . CSF volumes ranged from 5-15 mL per patient. When selecting patients with high pleocytosis, we were aware of the possible misdiagnosis of neuromyelitis optica spectrum disorders (NMOSD). Special care was taken to follow the current McDonald criteria for the diagnosis of MS<sup>1,2</sup>. None of the patients met the diagnostic criteria for NMOSD, in particular spinal lesions spanning  $\geq 3$  segments<sup>3</sup>. Patients were tested for antibodies against aquaporin-4 and MOG and showed negative results. Patient MS37, who showed the highest pleocytosis of 57 cells /  $\mu\text{l}$ , had a spinal lesion spanning one segment in addition to several small subventricular contrast enhancing lesions. In order to avoid a misdiagnosis, her serum (and CSF) were tested repeatedly and in different laboratories for anti-aquaporin-4 and anti-MOG antibodies and always tested negative. Considering all symptoms and laboratory results, the patient did not meet criteria of NMOSD and the MS diagnosis remained. Of note, patient MS39, from whom antibody MS39p2w174 was selected, possessed 18 cells /  $\mu\text{l}$ , which was in the middle of the range of CSF cell counts (Extended Data Table 1).

### HLA phenotype and HLA binding prediction

While our manuscript focuses on B cell biology and antibody-mediated molecular mimicry, we briefly discuss our data on human and mouse T cell reactivity against EBNA1 and GlialCAM (Extended Data Fig. 10). Patients' HLA genotypes could profoundly influence T cell reactivity to either antigen. We should point out that patient MS39, from whom antibody MS39p2w174 originated, is not a carrier of the most significant MS risk allele HLA-DRB1\*15:01 (Supplementary Table 1). The patient carries HLA-DRB1\*03:01, a second HLA class II risk allele for MS with lower significance. The patient did not carry any of the protective HLA class I alleles (HLA-A\*02:01, HLA-B\*44:02, HLA-B\*38:01 and HLA-B\*55:01)<sup>4,5</sup>. We used the prediction tools SYFPEITHI, NetMHC, and IEDB to predict binding of EBNA1 and GlialCAM peptides to the patient's molecular HLA setup, and included the main MS risk allele HLA-DRB1\*15:01 (Supplementary Fig. 2). We listed the 10 highest binding peptides of EBNA1 and GlialCAM for each HLA allele as well as the highest prediction for a peptide containing the central binding motifs of antibody MS39p2w174 (EBNA1<sub>AA394-400</sub> and GlialCAM<sub>AA377-383</sub>). These motifs were not predicted to be presented particularly well on either HLA class I or HLA class II and were never amongst the top 10 predicted binders. However, multiple other regions of both proteins are predicted to be presented well on several alleles, with GlialCAM peptides binding slightly better to HLA class I alleles (Supplementary Fig. 2a) and EBNA1 peptides binding slightly better to HLA class II alleles (Supplementary Fig. 2b). Peptides of both proteins can be presented well on HLA-DRB1\*15:01, but only EBNA1 binds tightly to HLA-DRB1\*03:01. Presentation of EBNA1 on HLA-DRB1\*15:01 and HLA-DRB1\*03:01 might be part of the explanation how these alleles contribute to MS risk.

## References

1. Thompson, A. J. *et al.* Diagnosis of multiple sclerosis: 2017 revisions of the McDonald criteria. *Lancet Neurol.* **17**, 162–173 (2018).
2. Polman, C. H. *et al.* Diagnostic criteria for multiple sclerosis: 2010 revisions to the McDonald criteria. *Ann. Neurol.* **69**, 292–302 (2011).
3. Wingerchuk, D. M. *et al.* International consensus diagnostic criteria for neuromyelitis optica spectrum disorders. *Neurology* **85**, 177–189 (2015).
4. Moutsianas, L. *et al.* Class II HLA interactions modulate genetic risk for multiple sclerosis. *Nat. Genet.* **47**, 1107–1113 (2015).
5. de la Concha, E. G. *et al.* DRB1\*03:01 haplotypes: differential contribution to multiple sclerosis risk and specific association with the presence of intrathecal IgM bands. *PLoS One* **7**, e31018 (2012).
